# Supplementary material for: Controlled synthesis and enhanced photoelectro-catalytic activity of a 3D TiO2 nanotube array/TiO2 nanoparticle heterojunction using a combined dielectrophoresis/sol–gel method
Source: Royal Society of Chemistry journal article supplement (doi:10.1039/c9tc00568d), 2019-01-01
Supplement: c9tc00568d1.pdf [file c9tc00568d1.pdf]

# **Controlled synthesis and enhanced photoelectro-catalytic activity of 3D TiO<sub>2</sub> nanotube arrays/TiO<sub>2</sub> nanoparticles heterojunction using a combined dielectrophoresis/sol-gel method**

Ruiyu Bao, Chen Chen, Jianxin Xia, Huiying Chen, Hua Li \*

College of Life and Environmental Sciences, Minzu University of China, Beijing, 100081, China

**Fig.S1** SEM images of 3D-TNAs/TiO<sub>2</sub> processed by DEP/sol-gel.

**Table S1** Inner diameter, wall thickness, and particle size of the cathode 3D-TNAs/TiO<sub>2</sub>.

**Table S2** Inner diameter, wall thickness, and particle size of the anode 3D-TNAs/TiO<sub>2</sub>.

**Fig.S1**

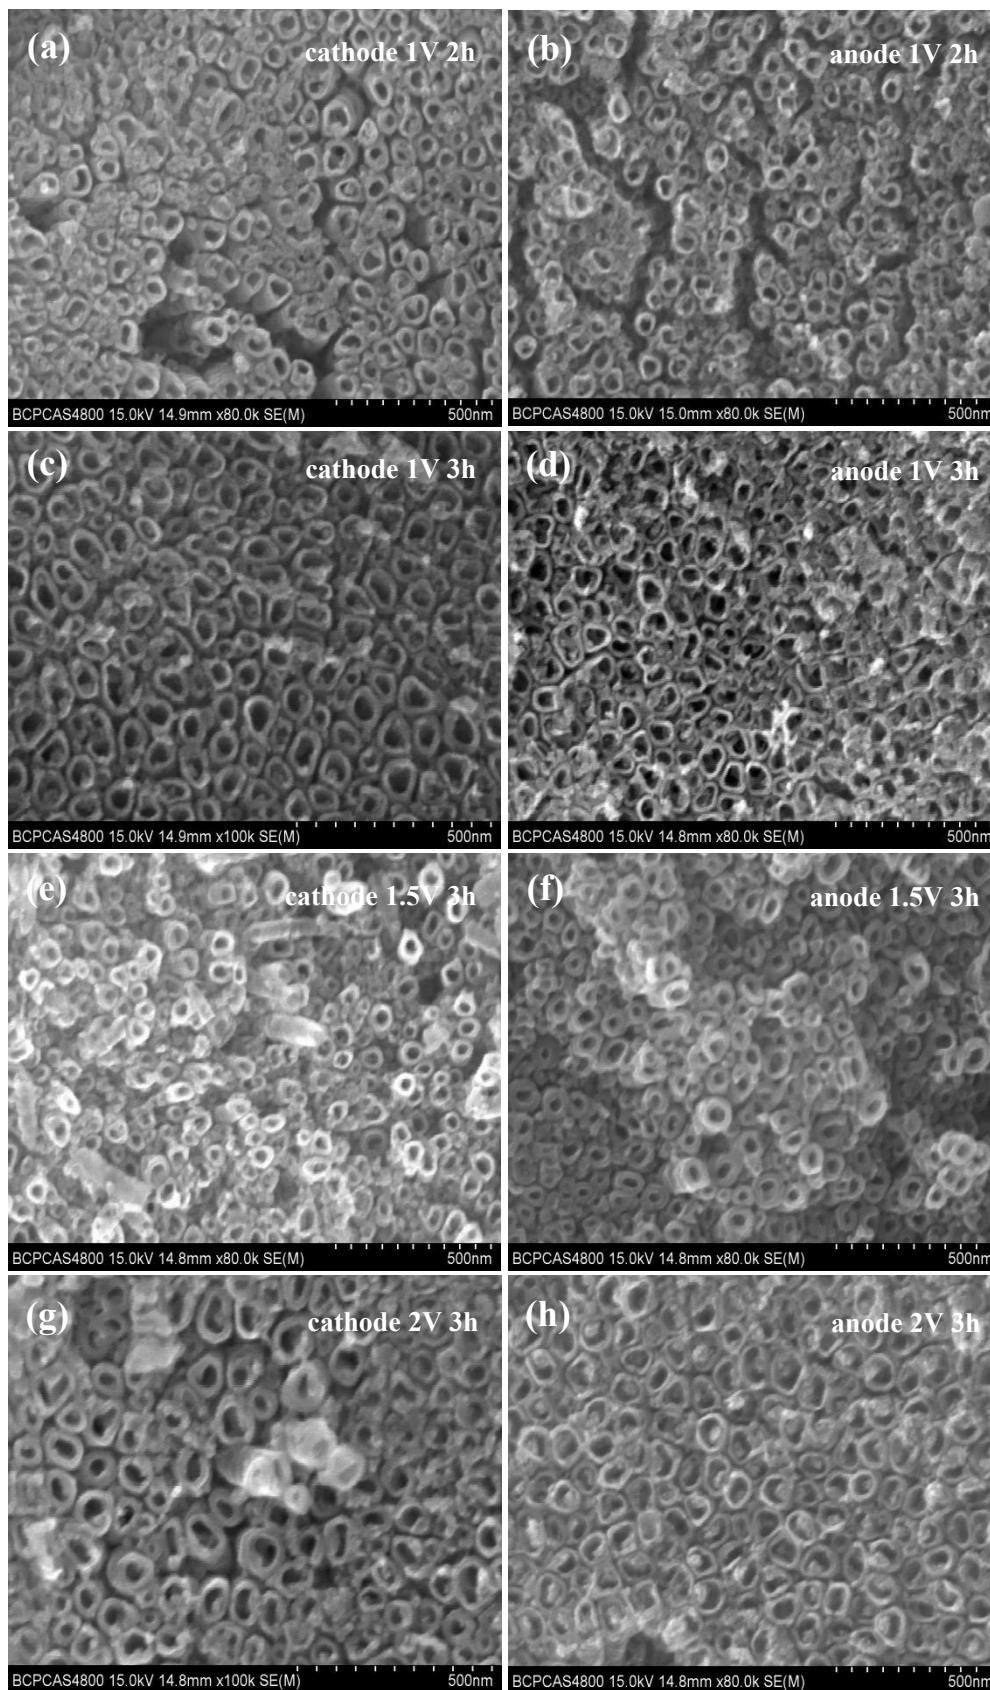

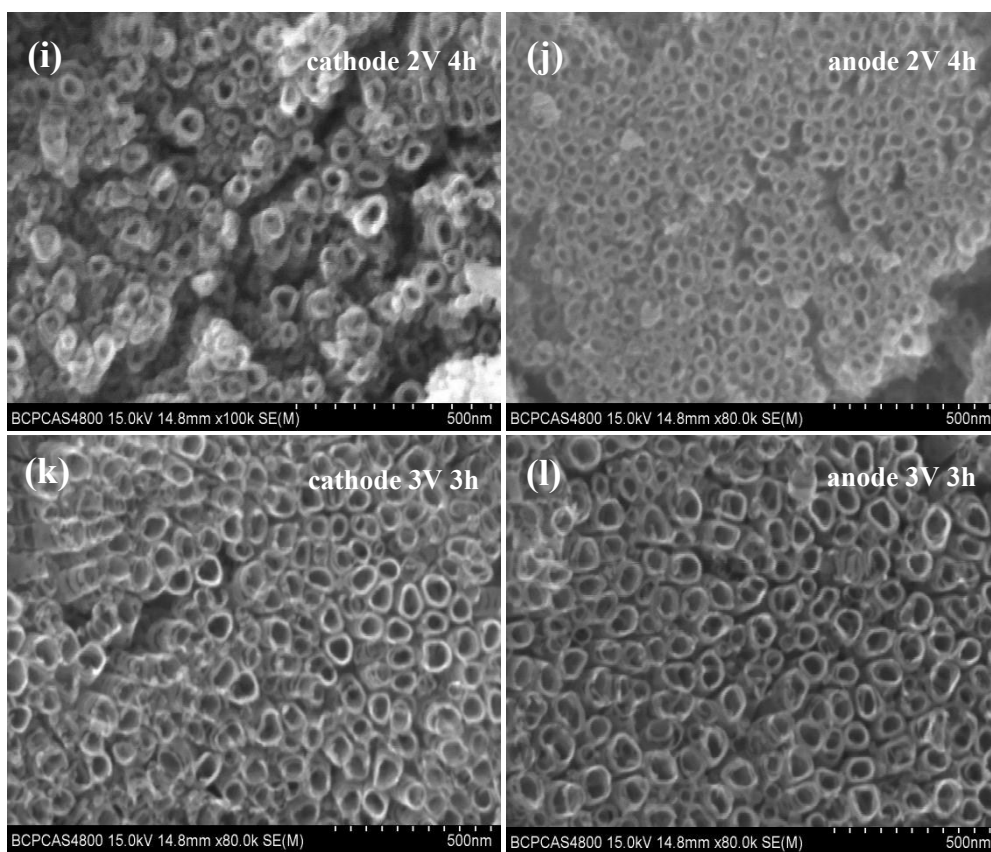

**Table S1**

| Cathode 3D-<br>TNAs/TiO <sub>2</sub> | 1V 2h | 1V 3h | 1.5V 3h | 2V 3h | 2V 4h | 3V 3h |
|--------------------------------------|-------|-------|---------|-------|-------|-------|
| Inner diameter (nm)                  | 31    | 33    | 30      | 41    | 25    | 41    |
| Wall thickness (nm)                  | 20    | 16    | 12      | 16    | 16    | 10    |
| Particle size (nm)                   | 15    | 16    | 12      | 16    | 12    | 12    |

**Table S2**

| Anode 3D-TNAs/TiO <sub>2</sub> | 1V 2h | 1V 3h | 1.5V 3h | 2V 3h | 2V 4h | 3V 3h |
|--------------------------------|-------|-------|---------|-------|-------|-------|
| Inner diameter (nm)            | 31    | 41    | 31      | 41    | 26    | 41    |
| Wall thickness (nm)            | 15    | 15    | 20      | 15    | 10    | 10    |
| Particle size (nm)             | 15    | 15    | 15      | 15    | 10    | 10    |
